**Multidisciplinary teamwork among healthcare workers in the provision of Prevention of Mother-to-child transmission services in the three tertiary hospitals in Fiji: A qualitative perspective.**

Amina RAZZAQ<sup>1</sup> \*

PhD candidate, MIPH/MHM

Email: [amina.razzaq@sydney.edu.au](mailto:amina.razzaq@sydney.edu.au)

ORCID: 0000-0002-6179-9042

Heather Worth<sup>2</sup>

Professor, PhD

Email: [h.worth@unsw.edu.au](mailto:h.worth@unsw.edu.au)

Neeloy Ashraful ALAM<sup>1</sup>

*Associate Professor, PhD*

Email: [neeloy.alam@sydney.edu.au](mailto:neeloy.alam@sydney.edu.au)

ORCID: 0000-0001-7034-1095

<sup>1</sup> Sydney School of Public Health, The University of Sydney, Faculty of Medicine and Health, NSW 2006, Sydney Australia.

<sup>2</sup> School of Public Health and Community Medicine, Samuels Building (F25), University of New South Wales, Kensington, NSW 2033, Australia.

NOTE: This preprint reports new research that has not been certified by peer review and should not be used to guide clinical practice.

\* **Correspondence: Amina Razzaq**, Sydney School of Public Health, The University of Sydney, Edward Ford Building (A27), NSW 2006, Australia. Email: [amina.razzaq@sydney.edu.au](mailto:amina.razzaq@sydney.edu.au) ,+61 2 98258671.

### **Author Disclosure Statements**

**Conflict of Interest:** The authors declare that they have no conflict of interest.

**Ethical Approval:** Ethics approvals from the University of New South Wales Human Research Ethics Committee (Ref. HCHC12460), and the Fiji National Research Ethics committee (approval /identification code 012 67) were obtained.

**Funding Sources:** One-year study scholarship has been provided by the Human Resources for Health Knowledge Hub, University of New South Wales. No other grant was received in the development of this study. This research did not receive any specific grant from funding agencies in the public, commercial, or not-for-profit sectors.

### **Acknowledgement**

This study is a part of the first author's thesis to fulfil the requirements for the Doctor of Philosophy at the University of Sydney. We thank the Fiji Ministry of Health, Fiji Ministry of Education and the Suva hospital team for authorising and facilitating fieldwork and data collection. The authors' special gratitude goes to the study participants for their time and valuable contributions. Finally, we acknowledge that data was collected during the first author's PhD candidature at the University of New South Wales (UNSW). We thank all the former supervisors and the current supervisors for their valuable contributions with special recognition to beloved Professor Joanne Travaglia, who recently passed away.

## **Authors' contributions**

AA and HW designed the study. AR performed the analysis and interpreted the data and AA reviewed it. AR prepared the manuscript. AA provided guidance and critical feedback throughout the write-up. AA, and HW critically reviewed the draft versions of the manuscript. All authors read and approved the final manuscript.

## **Abstract**

### **Introduction**

Teamwork is considered as an effective strategy in the provision of quality patient care including the prevention of mother-to-child transmission (PMTCT) of human immunodeficiency virus (HIV). Multidisciplinary teamwork (collaborative practice) among healthcare workers has widely accepted as a source of optimising healthcare provision and improving patient safety. The World Health Organisation [WHO] endorsed the need to establish effective teamwork within healthcare settings, in a quest to address the challenges of fragmented health systems to improve the utilisation of an efficient and effective workforce and deliver high quality patient care.

### **Aim**

We aim to understand the key contributory factors in establishing effective multidisciplinary teamwork among healthcare workers in providing prevention of mother-to-child transmission services to HIV-positive pregnant women and their infants.

### **Methods**

Data was collected using in-depth interviews. Interviews were conducted in the three tertiary hospitals and associated health clinics in Fiji between April-May 2013 and February-March 2014. Ethical approvals were obtained. A total of 58 healthcare providers were interviewed including doctors (n=12), midwives (n=19), nurses (n= 14), laboratory technicians (n=5) and counsellors (n=8) were interviewed. The data was analysed using thematic analysis.

### **Results**

We found that multidisciplinary teamwork was an overarching theme followed by three sub-themes in discussing what constitutes effective multidisciplinary teamwork among these healthcare providers in delivering PMTCT services to HIV-positive pregnant women and their

infants. The three sub themes included: integration of PMTCT services, effective communication and supportive colleagues.

## **Conclusion**

Our findings would be useful in developing strategies to foster teamwork and improve working relationships between healthcare workers in other similar settings.

**Keywords:** SDG 3: Good health and well-being, SDG 10: Reduced inequalities, Mother to child transmission of HIV, multidisciplinary teamwork, effective communication, working environment, Fiji.

## INTRODUCTION

Teamwork among healthcare workers is considered as an effective strategy in the provision of quality patient care, leading to improved health outcomes, provider satisfaction and efficient use of organisational resources (O'Daniel and Rosenstein 2008, Njosing, Edin et al. 2011, Penney 2013, Wami, Demssie et al. 2016, Dassah, Dzomeku et al. 2023). The World Health Organisation [WHO] endorsed the need to establish effective teamwork within healthcare settings (WHO 2010), in a quest to address the challenges of healthcare systems. WHO recommended developing specialised multidisciplinary teams, consisting of healthcare workers from different professional backgrounds (e.g. physicians, nurses, midwives, and other related healthcare workers) working together in utilising wide range of skills and knowledge to improve the utilisation of an efficient workforce and deliver high quality patient care (WHO 2010, Elgalib, Al-Sawafi et al. 2018). Other interchangeable terms have been widely used to refer to teamwork among healthcare workers such as interprofessional collaboration (Vrazo, Firth et al. 2018), interprofessional teamwork (Dassah, Dzomeku et al. 2023), collaborative practice (Ngunyulu, Peu et al. 2017) and multidisciplinary teamwork (Elgalib, Al-Sawafi et al. 2018).

The multidisciplinary teamwork approach is vital in streamlining HIV care (Elgalib, Al-Sawafi et al. 2018) including Prevention of mother-to-child transmission (PMTCT) services due to the complex intervention (Vrazo, Firth et al. 2018). PMTCT intervention is composed of essential sequential steps known as the cascade of treatment that are needed to prevent mother-to-child HIV transmission. PMTCT cascade involves the uptake of services including antenatal care; HIV counselling and testing; receiving antiretroviral therapy for HIV positive pregnant women; safe birth; infant follow up; infant feeding recommendations and postnatal follow-ups (WHO 2015, Pinto, Witte et al. 2018). Due to the complexity of PMTCT cascade (Pinto, Witte et al. 2018) it requires several skilled healthcare workers across the health system to work together to provide

PMTCT services. Therefore, multidisciplinary teamwork is particularly important to provide high quality PMTCT services to HIV-positive pregnant women and their infants (WHO 2010, Aishat and Olubunmi 2016). Barriers to multidisciplinary teamwork which include poor communication, lack of common goals, lack of leadership, poor team cohesion, professional culture and hierarchical relationships (Cain, Taborda-Whitt et al. 2017, Waggie and Arends 2021). Lack of teamwork and communication breakdown among healthcare workers were considered as a barrier in providing quality HIV care (Nzinga, Mbindyo et al. 2009, Aveling, Kayonga et al. 2015) including PMTCT services provision (Aveling, Kayonga et al. 2015). Studies have shown that communication breakdown resulted in unnecessary delays in service provision, disputes among healthcare workers and work fatigue (Cain, Taborda-Whitt et al. 2017) and a reduction in healthcare workers' motivation to provide quality HIV care (Dieleman, Gerretsen et al. 2009). Lack of effective communication and collaboration among interprofessional teams has resulted in poorly coordinated patient care (Moncatar, Nakamura et al. 2021).

Fiji is classified as a low HIV prevalence country. However, HIV infection rates are gradually increasing (Fiji-MoH 2012). In Fiji, PMTCT services were provided at the three divisional hospitals and their associated reproductive health centres at the time of data collection of this study. Fiji's National Prevention of Parent to Child Transmission of HIV Policy 2010-2014 and the National Strategic Plan 2012-2015 recommended that PMTCT care should include a holistic approach to HIV treatment and care, and develop a multidisciplinary core team (Fiji-MoH 2012). An HIV core team should consist of an obstetrician, a midwife/nurse, a counsellor, and a pediatrician (Fiji-MoH 2010) to oversee the PMTCT service provision across the continuum of care. The formation of this multidisciplinary healthcare team was to ensure the provision of comprehensive antenatal care and postnatal management for HIV-positive mothers and their infants (Fiji-MoH 2010).

There is a growing number of studies on teamwork among HIV workers, most of which have focused on teamwork in high HIV prevalence settings (Agadjanian and Hayford 2009, Garcia, Li et al. 2011, Njosing, Edin et al. 2011). However, this paper focuses on multidisciplinary teamwork among PMTCT workers in the perspectives of healthcare workers on health system challenges and a low HIV prevalence country. We conducted the research to explore facilitators related to the provision of PMTCT services in Fiji. This paper presents the partial findings of extensive research project. The aim of this paper was to understand the key contributory factors in establishing effective multidisciplinary teamwork among healthcare workers in providing PMTCT services in Fiji.

## **METHODS**

The methods section of this study was guided by the Consolidated Criteria for Reporting Qualitative Studies (COREQ) checklist (25). This checklist includes 32 required items designed to improve transparency and ensure comprehensive reporting of interviews in qualitative research (Supplementary Table 1).

### *Study setting*

The study was conducted at the three main divisional hospitals and their three associated reproductive health clinics where PMTCT services are provided in Fiji. The study sites included urban and semi-urban hospitals to ensure the study findings covered the different geographic locations and provided divergent viewpoints (Razee 2006). The pseudonyms for the study sites (Hospital A, B and C) were used for anonymity of the study participants.

### *Study Design*

This study took a qualitative approach to explore healthcare workers perspectives on health system challenges and facilitators for the provision of PMTCT services in tertiary hospitals in Fiji. Healthcare



workers were recruited purposively. Healthcare workers across the broad spectrum of PMTCT service provision (from the doctors to HIV counsellors) were carefully selected from difference sites where PMTCT services were provided in Fiji.

In-depth interviews were conducted to collect data using a semi-structured open-ended interview guide, enabling participants to respond freely and to elaborate where necessary. Healthcare workers were approached through the Head of Obstetrics and Gynaecology department and the Midwife in Charge of the Maternity unit, both of whom arranged for written information about the study to be sent to potential participants.

### *Data Collection*

The lead investigator (AR) conducted interviews between April - May 2013 and February - March 2014 in three hospitals. A total of 58 healthcare workers who were involved in the provision of PMTCT services were interviewed. The theoretical saturation was reached. The intention of these interviews was to understand healthcare worker perspectives on the barriers and enabling factors in providing PMTCT services. The interview schedules of previously published qualitative studies of HIV-related health services were reviewed to inform the development of the interview guide (Washington, Singer et al. 2008, Nguyen, Oosterhoff et al. 2009, Tynan, Vallely et al. 2018). All interviews were conducted in English and audio recorded, with permission to do this sought at the beginning of each interview. The duration of each interview varied between 30 minutes and an hour.

### *Data Analysis*

The data was analysed using a thematic analysis approach, which encompasses the identification, analysis, and reporting of themes within the data.

The interviews were transcribed verbatim (by AR). During transcription, the data was de-identified, by using pseudonyms instead of actual

names. All transcripts were double-checked against the audio recordings to ensure no errors occurred during transcription.

All interview transcripts were coded using NVivo 10 data management software (AR). An inductive coding technique was employed, where themes were derived from the interview data that were relevant to the study's objective. The selection of codes was discussed between the authors (AR and AA) prior to their integration into themes. Codes describing similar types of data were grouped to identify a theme. The emerging themes were validated after discussion among authors (Creswell 2014).

A draft code list was prepared by carefully checking the first five interview transcripts to derive codes by hand (by AR). The draft code list was independently checked by the study's co-author. Subsequently, the final code list was developed (AR and AA).

### *Ethical Approval*

Ethical approval was obtained from the University of New South Wales Human Research Ethics Committee (Ref: HCHC12460) and the Fiji National Research Ethics Committee (Ref: HC12460). To ensure transparency in communication, each participant was given a detailed participant information sheet. Written consent was also obtained from all participants, prior to their participation in the study.

## **FINDINGS**

We identified several themes in the data from the larger study; however, this paper focuses on multidisciplinary teamwork among healthcare workers while providing PMTCT related services to pregnant women in the hospitals included in the study.

A total of 58 healthcare providers including government employed doctors (n=12), midwives (n=19), nurses (n= 14), laboratory technicians (n=8) and non-government organisation (NGO) based HIV/Health

Screening counsellors (n=5) were interviewed. Six healthcare workers refused to participate due to their busy work schedules. Most of the healthcare workers who participated in the study identified as women, five were men (Table 1). The majority had over five years of experience (with an average of seven years' experience) working in antenatal clinics and PMTCT services. A few healthcare workers, specifically 19 out of 58, had received training on PMTCT in the previous two years. The thematic analysis identified the three main factors associated with facilitating teamwork among these workers. These three sub-themes include integration of PMTCT services, effective communication, and supportive colleagues.

### *Integration*

Integration of PMTCT services within the routine maternal and child health services in the three leading hospitals was evident from the interviews. Most of the healthcare workers, including doctors, nurses and midwives in this study highlighted that several different hospital departments were involved in the provision of PMTCT services. These include obstetric and gynaecological units (including antenatal clinic, labour, and postnatal wards), paediatric units and the HIV testing laboratory (Figure 1). The NGO-based HIV counsellors were responsible for providing pre and post HIV test counselling to pregnant women attending all three hospitals included in the study. The data showed that doctors were in charge of PMTCT service provisions across the hospitals. In addition, the associated reproductive health centres were involved in follow-up and continuity of care for the HIV-positive women after they had been discharged from the hospital. The interview data showed that PMTCT services were linked or integrated across most of the study sites (partially at Hospital A).

Most of the healthcare workers, including doctors, nurses, midwives and HIV Counsellors interviewed in this study stated that because of integrated PMTCT services, healthcare workers at different levels of service provision were working together as a team. While the word 'integration' was not mentioned by these workers, most of them stated

that different departments were connected and working with each other in the PMTCT service provision.

One midwife expressed the importance of teamwork across the continuum of PMTCT services provision. She acknowledged that once a pregnant woman was diagnosed as HIV-positive, then there was a chain of services offered to her. The treatment and care to HIV-positive pregnant women and their infants were provided by utilising a teamwork approach.

*“When we initially started [the PMTCT services], we were more confined because services were not linked, but now it is a team approach. Once someone is identified [as HIV-positive], we straight away get in the paediatrician and they talk about how the baby’s going to be cared for. And the HUB [reproductive health] centre, they come in when the patients are still in the hospital, because they need to follow these cases up. So, it’s more of a team approach now”.*

*(Interview\_9, Midwife,*

*Hospital A)*

Senior doctors and midwives reported that each hospital had a specialised PMTCT team, and it was known as a ‘HIV core team’. At the time of data collection, the core team met monthly to oversee the patient’s treatment and care plan in order to ensure a smooth HIV service provision. Similarly, a senior midwife and a doctor shared their experience that once a pregnant woman is diagnosed as HIV-positive, the HIV specialised units begin working together to provide the best treatment and care for both the HIV-positive mother and her infant. The quotes below reflect participants’ view on how healthcare workers from different departments are involved in the PMTCT service provision.

*“Once a case [HIV-positive pregnant women] has been identified, there’s a team approach in looking after them, so they can get the right care. We inform the obstetrician who recommends [the treatment and care plan] for the HIV-positive mother. Then we get in the paediatrician; they’ll talk*

*about the feeding options [for the infant] and then the HUB [reproductive health] centre”.*

*(Interview\_27, Midwife, Hospital B)*

and,

*“When we have a [HIV-positive] pregnant mom, then the HIV core team meet and discuss it [the care plan]. O and G [Obstetrics and gynaecology doctor] will contribute [to the care plan], like what medication they will be on, how the follow up is going to be and once they deliver. The paediatrician will look after the case and then it will come to the HUB - [reproductive health] centre”.*

*(Interview\_52, Doctor, Hospital C)*

Similarly, a midwife mentioned that the healthcare workers were collaborating with other specialised units as PMTCT services were integrated within the health system.

*“We have a [integrated] system in place, once we have a [HIV] positive mum, we started networking [with other units across hospital], We network with the paediatrician and others, that we have someone, who will be delivering very soon. Then they [paediatrician] need to come and discuss the feeding options and commence looking after the baby. So, the right care is given to them”.*

*(Interview\_26\_Midwife, Hospital B)*

### *Communication*

Most of the doctors, nurses, midwives and NGO based HIV counsellors across the study sites considered continuous communication among one another and with other specialised units was essential in developing good relationships and facilitating teamwork.

*“We have good teamwork [because] we communicate amongst each other to provide the right care to these cases [HIV-positive pregnant women]”.*

*(Interview\_6, Nurse, Hospital A)*

Our interview data also indicated healthcare workers considered ongoing communication between hospital staff and the NGO-based HIV counsellors from hospitals B and C developed good working relationships between them. Many healthcare workers from hospital B and C discussed effective communication as an outcome of increased access to HIV test counselling, particularly post-test counselling became good communication and improved referral counselling rates.

*“We explain [government employed healthcare workers} the process [pre-and post-test HIV counselling]. We talk to them in a way, you know, they are happy and then they start sending the mothers to us [HIV test counselling]. Otherwise, they [hospital workers’ just sit there and do their work and not knowing what we are here for”.*

*(Interview\_36 HIV Counsellor, Hospital B)*

On the other hand, the interviews from Hospital A indicated otherwise. NGO-based healthcare workers from Hospital A revealed low rates of post-test HIV counselling among pregnant women. The NGO-based HIV counsellors expressed that this was due to lack of communication and cooperation (teamwork) between both groups.

*“Post-test counselling [referral] is not really good here -- because they [Hospital healthcare workers] don’t refer mothers back to us and we miss out on their post-test counselling, -- I think mostly, the barriers between us, we have to talk more, communicate with each other, the Ministry and ourselves”.*

*(Interview\_ 14, NGO-based HIV counsellor, Hospital A)*

Another NGO-based HIV counsellor from Hospital B shared that in her

experience, that issues can also be resolved by effective communication.

*“When things don’t work out, we talk [ discuss] about it. We have our meetings, or I go straight to the assistant or to the nurse if anything [is problematic]. I’ve been here [for a long time] and they know me so, when I talk to them, they are open”.*

*(Interview\_36, HIV Counsellor, Hospital B).*

Further, most of the senior doctors, midwives and NGO-based HIV counsellors in this study reported that regular meetings between healthcare workers from different departments were paramount in improving communication and fostering teamwork.

In this regard a doctor acknowledged the importance of monthly meetings of the specialised PMTCT team in delivering effective PMTCT services for HIV-positive pregnant women and their infants. Similarly, an NGO-based HIV counsellor and a doctor indicated that teamwork among PMTCT workers was improved by effective communication during the regular meetings.

*“I think one of the strengths in dealing with PMTCT as well as HIV in is our HIV core team. We meet every month and discuss over cases. So that's one of the major strengths [in providing services]”.*

*(Interview\_52, Doctor, HUB C)*

and,

*“We have monthly meetings and if there are any changes or anything [new comes up], so we ask them [nurses and midwives]. We open it to the floor. If there are new ideas about anything, we bring that up in the meetings and discuss it.*

*(Interview\_1, Doctor, Hospital A)*

### *Supportive colleagues*

Supportive colleagues were repeatedly mentioned as an enabling factor in the provision of PMTCT services to HIV-positive pregnant women and their infants. Most healthcare workers including doctors, nurses, midwives, HIV counsellors in this study stated that their colleagues were supportive in fostering a good working relationship. One of the midwives shared her experience stating that her colleagues were cooperative while providing care to HIV-positive pregnant women.

*“My colleagues are very supportive; we all work together and help each other in looking after these cases [HIV-positive mothers]”.*

*(Interview\_21, Midwife, Hospital B)*

and,

*“The staff are so cooperative and all of us get along very well, as a team, we are having a very good relationship with each other”.*

*(Interview\_34, Doctor, Hospital B)*

The data illustrates that the NGO-based HIV counsellors and government employed healthcare workers, including doctors, nurses, midwives, at hospitals B and C had good working relationships and they work together while providing PMTCT services. One NGO-based HIV counsellor expressed that government employed healthcare workers were supportive and cooperate with them in providing HIV test counselling services to pregnant women.

*“In terms of working with the Ministry of Health, we get their full support, and they utilise our service [HIV counselling], which we have provided”.*

*(Interview\_49 HIV counsellor, Hospital C)*



However, the data from hospital A highlights the existence of tension between hospital employed healthcare workers and NGO-based HIV counsellor while providing HIV testing and counselling services to pregnant women. The predominant factors contributing to this tension include inadequate referral for HIV test counselling, a lack of cooperation and conflict arising from differences in counselling approaches as discussed in a different manuscript (Razzaq, Stephenson et al. 2023).

## **DISCUSSION**

This study explored the key contributory factors in establishing multidisciplinary teamwork among healthcare workers across the study sites. Our findings highlighted that the predominant factors that enabled multidisciplinary teamwork were integration of PMTCT services, effective communication, and supportive colleagues.

Our findings revealed that healthcare workers considered multidisciplinary teamwork as an important facilitator in the quality PMTCT services provided to HIV-positive pregnant women and their infants across the study sites. In Fiji, most of the hospitals under study have fully adopted teamwork approach. Our findings were aligned with the Fiji Prevention of parent-to-child transmission of HIV policy (2010) and the National Strategic Plan on HIV (2012-2015) both recommended a holistic team approach to the PMTCT services provision (Fiji-MoH 2012). These policies and plans have provided uniform guidance on the integration of PMTCT services into the primary healthcare system by utilising a holistic team approach.

However, our findings suggest that the holistic team approach component of the Fiji policy has only been partially implemented in one of the three hospitals we studied (Hospital A). This is due to the tensions between government employed healthcare workers and NGO-based HIV counsellors, as discussed in a separate publication (Razzaq, Stephenson et al. 2023).

Most of the participants emphasised the crucial role of integration in promoting teamwork and enhancing the quality of PMTCT service provision at most of the study sites. One potential explanation for this observation is the requirement of a multi-stage continuum of HIV care, which required PMTCT workers from different departments to work together in teams. This collaborative effort ensures the provision of coordinated care to HIV-positive pregnant women and their infants (WHO 2010, Elgalib, Al-Sawafi et al. 2018).

In Fiji, PMTCT services were only integrated at the three main hospitals in Fiji. These services were not offered at the sub-divisional level or any other health facilities in the country at the time of data collection. This indicates that PMTCT services were not integrated throughout the Fijian health system. This may be due to the low HIV prevalence; large scale integration of services was not required at the time of data collection. The integration of PMTCT services on a smaller scale might contribute to the cohesive linkage of PMTCT services across various departments in Fiji. Consequently, it became viable for PMTCT workers to collaborate in teams, ensuring the delivery of quality services.

Our data revealed that effective communication plays an important role in facilitating teamwork among PMTCT workers. Effective communication is a two-way exchange, which is conducive to developing collaborative working relationships among professionals (Rice, Zwarenstein et al. 2010). Studies from other settings have shown that communication (Mickan and Rodger 2005, Mbindyo, Gilson et al. 2009) is essential in facilitating information sharing, resolving conflicts, and building relationships (Mbindyo, Gilson et al. 2009). The respondents in our study considered continuous communication via face-to-face meetings within units and with the other specialised units was essential in the provision of quality PMTCT services. This has resulted in improving and maintaining teamwork that has led to improved service provision.

Further, our research revealed that access to HIV post-test counselling was improved in hospitals B and C as a result of ongoing communication

between the government employed hospital staff and the NGO-based HIV counsellors. This finding was also confirmed by reviewing the Empower Pacific Report (2015) (Empower Pacific 2015), indicating the rates of HIV post-test counselling sessions for Hospitals B and C were significantly higher than Hospital A. In 2014, approximately 75% of pregnant women received HIV post-test counselling sessions in the Hospital B and 73% in Hospital C, whereas only 41% of women received the post-test counselling in Hospital A (Empower Pacific 2015). The significantly high rates of HIV post-test counselling in hospitals B and C could be due to an effective communication between the nurses and the NGO-based counsellors in these hospitals, as compared to the Hospital A.

Supportive coworkers played an important role in developing relationships with other PMTCT workers and facilitating teamwork. Previous research found that support from colleagues and supervisors played an important role in enhancing healthcare workers motivation (Dieleman, Gerretsen et al. 2009) to provide quality care, as well as improving patients' experience of service provision (Dieleman, Gerretsen et al. 2009). Our findings were consistent with previous studies', that supportive colleagues play a significant role in building good working relationships with each other (Dieleman, Gerretsen et al. 2009, Mbindyo, Gilson et al. 2009).

Overall, Fiji has made significant progress in the provision of PMTCT services since the program commenced in 2005. It is evident that HIV counselling and testing and antiretroviral coverage among pregnant women and infants has improved over the years (Fiji-MoH 2012). Approximately, 98% of pregnant women consented to receive HIV testing in 2013 after they had undergone pre-test counselling (Fiji-MoH 2010), compared to 66% in 2006 (Fiji-MoH 2012) and 64% in 2003 (Washington, Singer et al. 2008). The linkage of counselling services with antenatal care will have played a significant role in this pre-test counselling of

pregnant women.

One of reasons behind this success is that PMTCT workers in Fiji have taken adopted multidisciplinary teamwork, working effectively with each other (partially at hospital A). Multidisciplinary teamwork among PMTCT workers play an important role in improvements in the PMTCT services provision in Fiji. Although there was a hierarchical system in the PMTCT service provision, effective communication and good relationships with each other could have weakened the traditional culture of hierarchy, and therefore, the efforts to provide effective PMTCT services in Fiji were not undermined.

## **LIMITATION**

Our study has some limitations that should be considered when interpreting the results. Firstly, we reported the experiences and perceptions of healthcare workers and may be biased. This could arise when participants' respond based on what they think they interviewer wants to hear, leading to bias. However, we attempted to minimise bias by collecting and triangulating data from different levels of healthcare workers which enabled us to capture experiences from different healthcare workers perspectives.

A strength of the study included collecting and triangulating data from healthcare workers at different levels. Further research that encompasses in-depth interviews with healthcare workers from different departments would be beneficial in gaining a better understanding if multidisciplinary team approach exists throughout the Fijian health system. This would also provide greater insight into their implications in context of the Asia-Pacific Region.

## **CONCLUSION**

Multidisciplinary teamwork was found to play an important role in the PMTCT service provision in the three tertiary hospitals in Fiji (partially at Hospital A). Integration of PMTCT service, effective communication and supportive colleagues were the enabling factors in facilitating successful teamwork and improving the working relationships between these healthcare workers. To validate our findings, the Fiji PMTCT related policies were reviewed to obtain some useful insights into how PMTCT services were delivered in Fiji. Our findings have confirmed that the teamwork component of Fiji National policy was adopted at the local hospital level at most of the study sites (but exists partially at Hospital A). Multidisciplinary teamwork has influenced healthcare workers to work together in a coordinated way to ensure high-quality service provision. However, there is a need to improve teamwork among hospital healthcare workers and NGO-based HIV counsellors at Hospital A to ensure streamlined HIV counselling services to women attending antenatal clinics in Fiji.

## REFERENCE

Agadjanian, V. and S. R. Hayford (2009). "PMTCT, HAART, and childbearing in Mozambique: an institutional perspective." *AIDS Behav* **13 Suppl 1**(Suppl 1): 103-112.

Aishat, U. and A. Olubunmi (2016). "Prevention of Mother-to-Child Transmission of HIV/AIDS: Perception of Health Care Workers in Rural Areas of Oyo State." *Scientifica (Cairo)* **2016**(4257180).

Aveling, E. L., Y. Kayonga, A. Nega and M. Dixon-Woods (2015). "Why is patient safety so hard in low-income countries? A qualitative study of healthcare workers' views in two African hospitals." *Global Health* **11**: 6.

Cain, C. L., C. Taborda-Whitt, M. Frazer, S. Schellinger, K. M. White, J. Kaasovic, B. Nelson and A. Chant (2017). "A mixed methods study of emotional exhaustion: Energizing and depleting work within an innovative healthcare team." *J Interprof Care* **31**(6): 714-724.

Creswell, J. (2014). *Research Design: Qualitative, Quantitative, and Mixed Methods Approaches*. California, SAGE Publications Inc.

Dassah, E. T., V. M. Dzomeku, B. R. Norman, D. Gyaase, M. N. A. Opare-Addo, K. O. Buabeng and Y. Adu-Sarkodie (2023). "Attitudes of health care professionals towards interprofessional teamwork in Ashanti Region, Ghana." *BMC Medical Education* **23**(1): 319.

Dieleman, M., B. Gerretsen and G. J. van der Wilt (2009). "Human resource management interventions to improve health workers' performance in low

and middle income countries: a realist review." Health Res Policy Syst **7**:  
7.

Elgalib, A., H. Al-Sawafi, B. Kamble, S. Al-Harthy and Q. Al-Sariri (2018).  
"Multidisciplinary care model for HIV improves treatment outcome: a  
single-centre experience from the Middle East." AIDS Care **30**(9): 1114-  
1119.

Empower Pacific (2015). EMPOWER PACIFIC Annual Report 2014. Lautoka,  
Empower Pacific Counselling and Social services.

Fiji-MoH (2010). "FIJI POLICY ON PREVENTION OF PARENT TO CHILD  
TRANSMISSION (PPTCT) OF HIV."

Fiji-MoH (2012). Global AIDS Progress Report 2012 UNGASS Report, Suva,  
Ministry of Health.

Garcia, M. E., M. S. Li, H. Siril, C. Hawkins, S. Kaaya, S. Ismail, G. Chalamilla,  
S. G. Mdingi and L. R. Hirschhorn (2011). "Health-care worker  
engagement in HIV-related quality improvement in Dar es Salaam,  
Tanzania." International Journal for Quality in Health Care **23**(3): 231-  
238.

Mbindyo, P., L. Gilson, D. Blaauw and M. English (2009). "Contextual influences  
on health worker motivation in district hospitals in Kenya."  
Implementation Science **4**(43).

Mickan and S. Rodger (2005). "Effective health care teams: a model of six characteristics developed from shared perceptions." Journal of Interprofessional Care, **19**(4): 358– 370.

Moncatar, T. J. R. T., K. Nakamura, K. L. L. Siongco, K. Seino, R. Carlson, C. C. Canila, R. S. Javier and F. M. E. Lorenzo (2021). "Interprofessional collaboration and barriers among health and social workers caring for older adults: a Philippine case study." Human Resources for Health **19**(1): 52.

Ngunyulu, R., M. Peu, F. Mulaudzi, M. L. S. Mataboge and S. Phiri (2017). "Collaborative HIV care in primary health care: Nurses' views." International Nursing Review **64**.

Nguyen, T. A., P. Oosterhoff, Y. N. Pham, A. Hardon and P. Wright (2009). "Health workers' views on quality of prevention of mother-to-child transmission and postnatal care for HIV-infected women and their children." Human Resources for Health **7**(1): 39.

Njosing, B. N., K. E. Edin, M. S. Sebastián and A.-K. Hurtig (2011). "Voices from the frontline: counsellors' perspectives on TB/HIV collaborative activities in the Northwest Region, Cameroon." BMC Health Services Research **11**(1): 328.

Nzinga, J., P. Mbindyo, L. Mbaabu, A. Warira and M. English (2009). "Documenting the experiences of health workers expected to implement guidelines during an intervention study in Kenyan hospitals." Implement Sci **4**: 44.

O'Daniel, M. and A. H. Rosenstein (2008). Advances in Patient Safety Professional Communication and Team Collaboration. Patient Safety



and Quality: An Evidence-Based Handbook for Nurses. R. G. Hughes.  
Rockville (MD), Agency for Healthcare Research and Quality (US).

Penney, P. R. (2013). Collaborative practice: a grounded theory of connecting in community rehabilitation.

Pinto, R. M., S. S. Witte, P. Filippone, C. J. Choi and M. Wall (2018). "Interprofessional Collaboration and On-the-Job Training Improve Access to HIV Testing, HIV Primary Care, and Pre-Exposure Prophylaxis (PrEP)." AIDS Educ Prev **30**(6): 474-489.

Razee, H. (2006). Being a Good Woman': Suffering and Distress through the voices of women in the Maldives. PhD, University of New South Wales.

Razzaq, A., N. Stephenson, C. Raynes-Greenow, J. Travaglia and N. A. Alam (2023). "Understanding the relationship between the public sector healthcare workers and NGO-based HIV counsellors while providing HIV counselling and testing services to pregnant women: A Qualitative Study in Suva, Fiji." Midwifery **120**: 103634.

Rice, K., M. Zwarenstein, L. G. Conn, C. Kenaszchuk, A. Russell and S. Reeves (2010). "An intervention to improve interprofessional collaboration and communications: a comparative qualitative study." J Interprof Care **24**(4): 350-361.

Tynan, A., L. Vallely, M. Kupul, R. Neo, V. Fiya, H. Worth, G. Kariwiga, G. D. L. Mola, J. Kaldor and A. Kelly-Hanku (2018). "Programmes for the prevention of parent-to-child transmission of HIV in Papua New Guinea: Health system challenges and opportunities." The International Journal of Health Planning and Management **33**(1): e367-e377.

- Vrazo, A. C., J. Firth, A. Amzel, R. Sedillo, J. Ryan and B. R. Phelps (2018). "Interventions to significantly improve service uptake and retention of HIV-positive pregnant women and HIV-exposed infants along the prevention of mother-to-child transmission continuum of care: systematic review." Tropical Medicine & International Health **23**(2): 136-148.
- Waggie, F. and N. E. Arends (2021). "Exploring interprofessional teamwork at a tertiary public hospital in South Africa." Journal of Interprofessional Care **35**(5): 672-681.
- Wami, S. D., A. F. Demssie, M. M. Wassie and A. N. Ahmed (2016). "Patient safety culture and associated factors: A quantitative and qualitative study of healthcare workers' view in Jimma zone Hospitals, Southwest Ethiopia." BMC Health Serv Res **16**: 495.
- Washington, C. H., L. M. Singer, T. McCaig, L. Tikoduadua, S. T. Ali, J. Fong, J. Luveni, T. O. Kyaw-Myint, S. Watson and F. Russell (2008). "The prevalence of HIV infection in women attending antenatal clinics in Fiji." P N G Med J **51**(1-2): 56-59.
- WHO (2010). Framework for action on interprofessional education & collaborative practice. Geneva Switzerland: 14.
- WHO (2015). Guideline on when to start antiretroviral therapy and on pre-exposure prophylaxis for HIV. World Health Organization.

**Table 1: Characteristics of study participants from three hospitals who provide HIV related services to pregnant women in Fiji.**

| <b>Characteristics of Healthcare workers</b>       | <b>N=58</b> |
|----------------------------------------------------|-------------|
| <b>Gender</b>                                      |             |
| Male                                               | 5           |
| Female                                             | 53          |
| <b>Ethnicity</b>                                   |             |
| Fijian                                             | 44          |
| Indo-Fijian                                        | 14          |
| <b>Profession/occupation</b>                       |             |
| Medical Doctors/specialists                        | 12          |
| Midwives                                           | 19          |
| Nurses                                             | 14          |
| NGO-based HIV counsellors                          | 8           |
| Laboratory technicians                             | 5           |
| <b>Years of Experience as a healthcare worker</b>  |             |
| Under 5 years                                      | 25          |
| 5 years and over                                   | 33          |
| <b>Attended HIV training in the last two years</b> |             |
| Yes                                                | 19          |
| No                                                 | 39          |
| <b>PMTCT training/ refresher needed</b>            |             |
| Yes                                                | 58          |
| No                                                 | 0           |

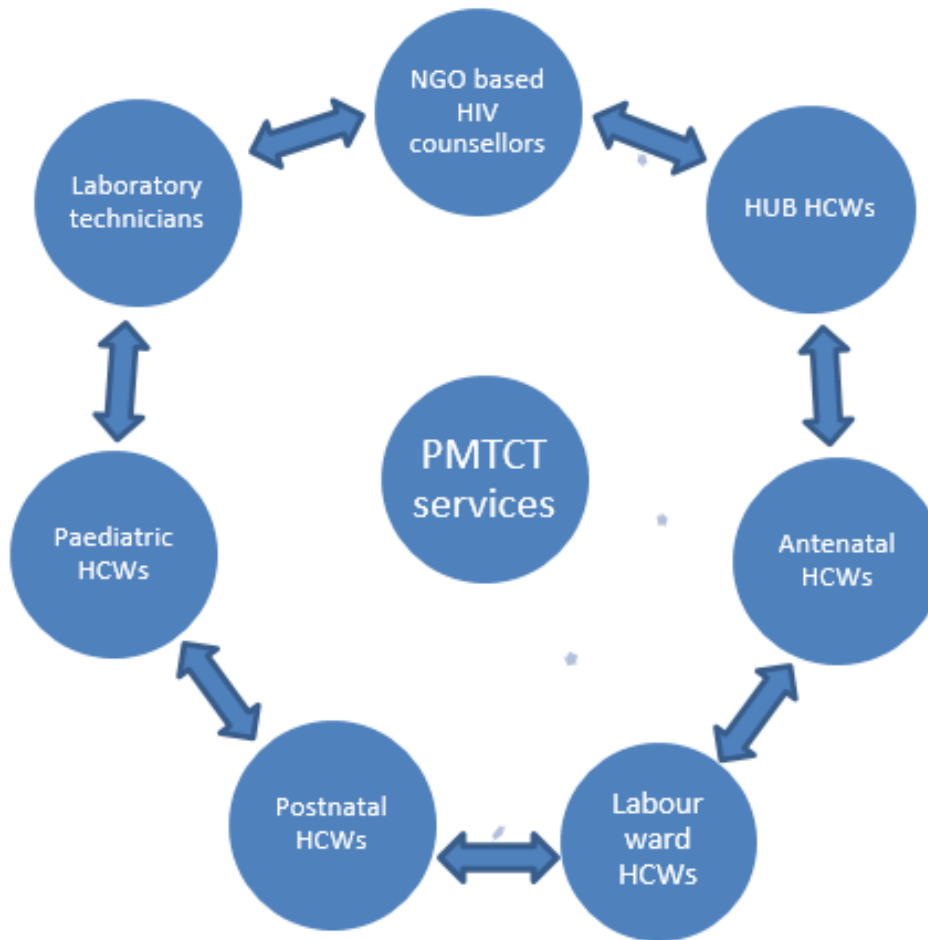

**Figure 1: Healthcare workers (HCWs) involved at different levels of PMTCT services provision in Fiji Hospitals.**
